# Supplementary material for: Unexpected performance of iron( iii )chloride in the polymerization of renewable 2,3-butanediol and the depolymerization of poly(ethylene terephthalate)
Source: Royal Society of Chemistry journal article supplement (doi:10.1039/d3su00388d), 2023-12-22
Supplement: d3su00388d1.pdf [file d3su00388d1.pdf]

## Supporting Information:

### Unexpected Performance of Iron(III)chloride in the Polymerization of Renewable 2,3-Butanediol and the Depolymerization of Poly(ethylene terephthalate)

*Anja Kirchberg,<sup>a</sup> Sandra Wegelin,<sup>a</sup> Leonie Grutke,<sup>a</sup> and Michael A. R. Meier<sup>a,b\*</sup>*

<sup>a</sup>Laboratory of Applied Chemistry, Institute of Organic Chemistry (IOC), Karlsruhe Institute of Technology (KIT), Straße am Forum 7, Karlsruhe 76131, Germany

<sup>b</sup>Laboratory of Applied Chemistry, Institute of Biological and Chemical System-Functional Molecular Systems (IBCS-FMS), Karlsruhe Institute of Technology (KIT), Hermann-von-Helmholtz-Platz 1, Eggenstein-Leopoldshafen 76344, Germany

## Contents

|                                                                            |    |
|----------------------------------------------------------------------------|----|
| <b>Purification of FDCA (1)</b> .....                                      | 2  |
| <b>2,3-Furandicarboxylic acid dimethyl ester (2)</b> .....                 | 3  |
| <b>Deconvolution Method for polycondensation reactions</b> .....           | 4  |
| <b>Polycondensation reactions of a dicarboxylic acid with BDO</b> .....    | 6  |
| <b>Copolymerization reactions of two dicarboxylic acids with BDO</b> ..... | 13 |
| <b>Depolymerization of Poly(ethylene terephthalate)</b> .....              | 21 |

## Purification of FDCA (1)

A mixture of water/methanol (3:5, v/v, 25 g) was prepared, followed by the addition of 1.00 g of unpurified FDCA and 0.30 g sodium hydrogen sulfite in a pressure vial. The mixture was heated to 90 °C for 30 minutes. Subsequently, water was added to dissolve unreacted sodium hydrogen sulfite, followed by cooling in an ice bath to 0 °C, which was maintained for 30 minutes. The precipitated product was filtered and dried under vacuum (<1 mbar). **1** was obtained as white powder.

$^1\text{H}$  NMR (400 MHz,  $\text{DMSO-}d_6$ )  $\delta$  / ppm = 7.26 (s, 2H,  $\text{CH}^1$ ).

$^{13}\text{C}$  NMR (101 MHz,  $\text{DMSO-}d_6$ )  $\delta$  / ppm = 159.02, 147.29, 118.13.

IR (ATR)  $\tilde{\nu}$  /  $\text{cm}^{-1}$  = 3151, 3124, 3065, 3055, 3046, 3011, 2999, 2989, 2978, 2970, 2941, 2915, 2884, 2874, 2859, 2797, 2789, 2557, 1680, 1674, 1571, 1522, 1417, 1273, 1228, 1187, 1162, 1041, 961, 845, 763, 525, 485.

HRMS (FAB)  $m/z$ :  $[\text{M}]^+$  calc. for  $\text{C}_8\text{H}_8\text{O}_5$ , 156.0054, found 156.0053;  $\Delta$  = 0.1 mmu.

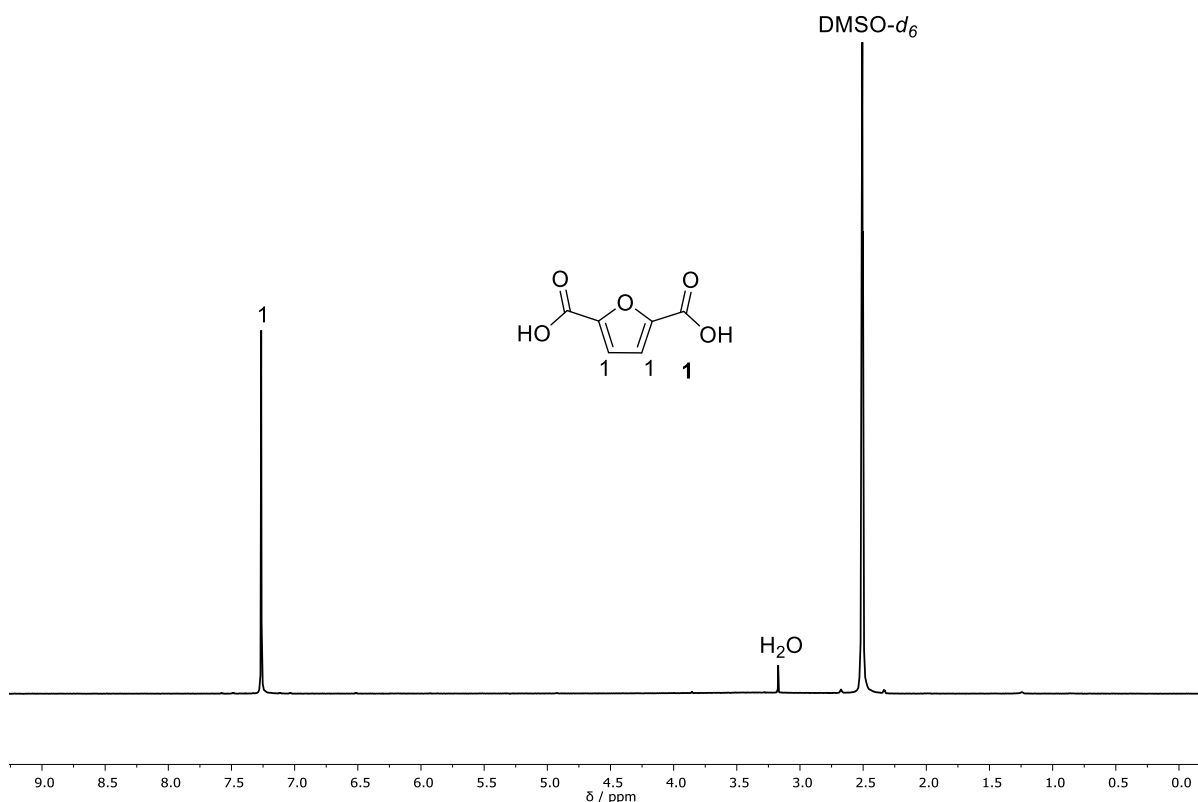

Figure S1.  $^1\text{H}$  NMR spectrum of **1** in  $\text{DMSO-}d_6$ .

## 2,3-Furandicarboxylic acid dimethyl ester (2)

5.00 g FDCA (1.00 equiv., 32.0 mmol) were dissolved in 130 mL methanol (100 equiv. 103 g, 3.20 mol), followed by adding 85.4  $\mu\text{L}$  sulfuric acid (0.05 equiv., 157 mg, 1.60 mmol). The mixture was stirred under reflux for 5 days. Reaction control was performed *via*  $^1\text{H}$  NMR spectroscopy until full conversion was observed. The reaction mixture was concentrated under vacuum and the precipitated product was washed with water. A recrystallization from methanol was performed before drying the product under vacuum (<1 mbar) to obtain **2** as white powder.

$^1\text{H}$  NMR (400 MHz,  $\text{DMSO-}d_6$ )  $\delta$  / ppm = 7.43 (s, 2H,  $\text{CH}^2$ ), 3.86 (s, 6H,  $\text{CH}_3^1$ ).

$^{13}\text{C}$  NMR (101 MHz,  $\text{DMSO-}d_6$ )  $\delta$  / ppm = 157.83, 146.03, 119.03, 52.39.

IR (ATR):  $\tilde{\nu}$  /  $\text{cm}^{-1}$  = 3116, 1718, 1602, 1584, 1514, 1432, 1378, 1308, 1271, 1236, 1191, 1160, 1131, 1028, 985, 921, 854, 835, 796, 765, 611, 481, 428.

HRMS (FAB)  $m/z$ :  $[\text{M}]^+$  calc for  $\text{C}_8\text{H}_8\text{O}_5$ , 184.0367, found 184.0366;  $\Delta$  = 0.1 mmu.

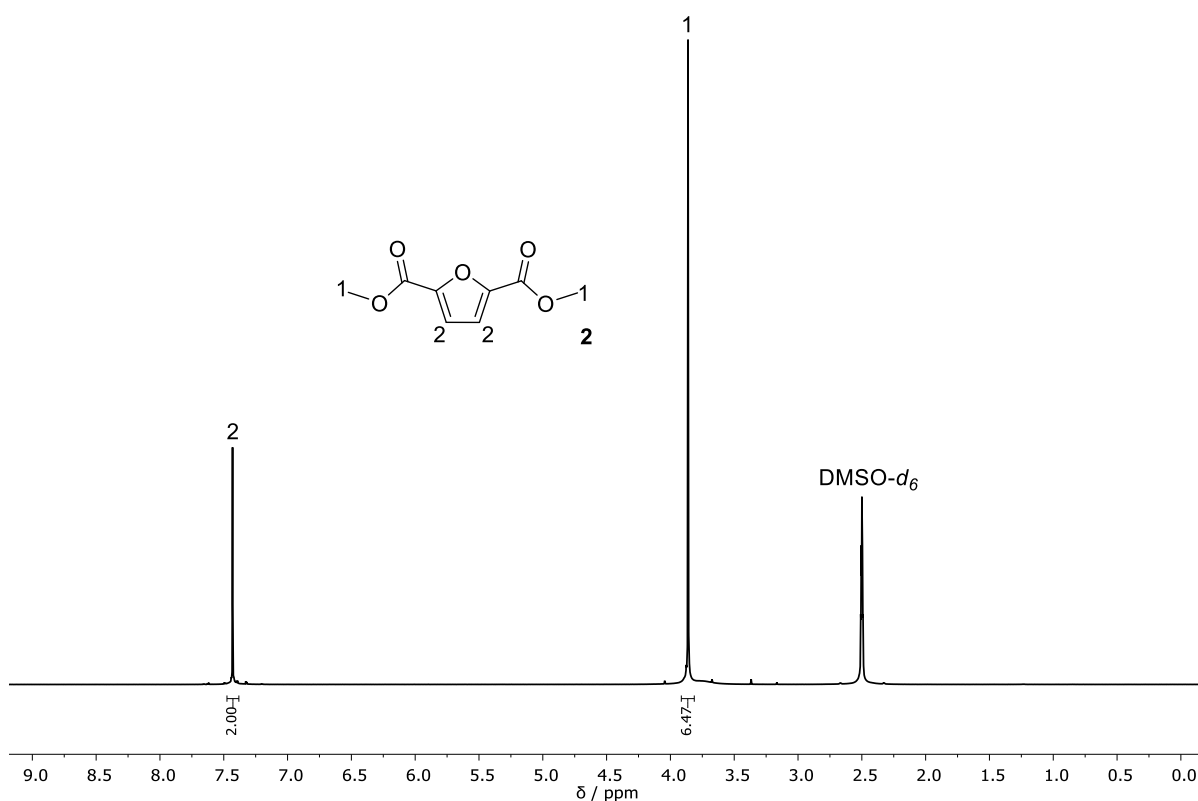

Figure S2.  $^1\text{H}$  NMR spectrum of **2** in  $\text{DMSO-}d_6$ .

## Deconvolution Method for polycondensation reactions

BDO (3.00 equiv., 2.70 g, 30.0 mmol) and FDCA (1.00 equiv., 1.56 g, 10.0 mmol) were used in a polycondensation reaction performed as follows: The catalyst loading per batch was 1.00 mol%. In the first batch, 16 different Lewis acids were tested, i.e.,  $\text{AlCl}_3$ ,  $\text{MgCl}_2 \cdot 6\text{H}_2\text{O}$ , TTIP,  $\text{In}(\text{Otf})_3$ ,  $\text{InCl}_3$ ,  $\text{CuCl}$ ,  $\text{SnCl}_2$ ,  $\text{ZnBr}_2$ ,  $\text{Zn}(\text{Otf})_2$ ,  $\text{Yb}(\text{Otf})_3$ ,  $\text{BF}_3 \cdot \text{O}(\text{C}_2\text{H}_5)_2$ ,  $\text{Sc}(\text{Otf})_3$ ,  $\text{FeCl}_3$ ,  $\text{Bi}(\text{Otf})_3$ ,  $\text{Ag}(\text{Otf})$ ,  $\text{LiBr}$ . The reaction flask was heated to 140 °C, followed by increasing the temperature to 180 °C within 4 hours. The temperature of 180 °C was kept for another 19 hours before vacuum (< 1 mbar) was applied to the system. The temperature was further increased to 190 °C and kept at this temperature for 1 hour. Then, the mixture was stirred at 200 °C under continuous vacuum (<1 mbar) for another 23 hours. The obtained polyester **3** was dissolved in HFIP, precipitated into methanol, then dried at 80 °C under vacuum (<1 mbar) for 6 hours, before SEC-HFIP was performed.

With batches **B1** to **B4** the desired polyesters were obtained and are listed with  $M_n$  and  $\mathcal{D}$  determined by SEC-HFIP in Tab. S1. For catalyst  $\text{CuCl}$ , no SEC-HFIP measurement was performed, as no precipitation to a desired polyester could be carried out.

Table S1.  $M_n$  and  $\mathcal{D}$  determined by SEC-HFIP of the respective polyesters listed with the used catalyst during the Deconvolution Method.

| Batch/Catalyst Number | Catalyst(s)                                                                                            | $M_n$ / kDa | $\mathcal{D}$ |
|-----------------------|--------------------------------------------------------------------------------------------------------|-------------|---------------|
| <b>B1</b>             | AlCl <sub>3</sub> , MgCl <sub>2</sub> * 6H <sub>2</sub> O, InCl <sub>3</sub> , CuCl                    | 9           | 1.47          |
| <b>B2</b>             | Zn(Otf) <sub>2</sub> , Yb(Otf) <sub>3</sub> , In(Otf) <sub>3</sub> , Bi(Otf) <sub>3</sub>              | -           | -             |
| <b>B3</b>             | TTIP, FeCl <sub>3</sub> , SnCl <sub>2</sub> , ZnBr <sub>2</sub>                                        | 9           | 1.93          |
| <b>B4</b>             | BF <sub>3</sub> ·O(C <sub>2</sub> H <sub>5</sub> ) <sub>2</sub> , Sc(Otf) <sub>3</sub> , Ag(Otf), LiBr | -           | -             |
| <b>B5</b>             | AlCl <sub>3</sub> , MgCl <sub>2</sub> * 6H <sub>2</sub> O                                              | 12          | 1.57          |
| <b>B6</b>             | InCl <sub>3</sub> , CuCl                                                                               | 10          | 1.47          |
| <b>B7</b>             | FeCl <sub>3</sub> , TTIP                                                                               | 16          | 2.22          |
| <b>B8</b>             | SnCl <sub>2</sub> , ZnBr <sub>2</sub>                                                                  | 10          | 1.82          |
|                       | AlCl <sub>3</sub>                                                                                      | 15          | 1.65          |
|                       | MgCl <sub>2</sub> * 6 H <sub>2</sub> O                                                                 | 11          | 1.19          |
|                       | InCl <sub>3</sub>                                                                                      | 9           | 1.86          |
|                       | CuCl                                                                                                   | -           | -             |
|                       | TTIP                                                                                                   | 14          | 1.95          |
|                       | FeCl <sub>3</sub>                                                                                      | 18          | 1.55          |
|                       | SnCl <sub>2</sub>                                                                                      | 11          | 1.23          |
|                       | ZnBr <sub>2</sub>                                                                                      | 10          | 2.26          |
|                       | *TTIP                                                                                                  | 10          | 2.22          |
|                       | *FeCl <sub>3</sub>                                                                                     | 17          | 1.53          |
|                       | Ti(OBu) <sub>4</sub>                                                                                   | 15          | 1.96          |

\***2** was used instead of unpurified FDCA

## Polycondensation reactions of a dicarboxylic acid with BDO

2.70 g of BDO (3.00 equiv., 30.0 mmol) were mixed with the respective dicarboxylic acid (1.00 equiv., 10.0 mmol) and  $\text{FeCl}_3$  (1.25 mol%., 20.0 mg, 0.120 mmol) as catalyst. The reaction mixture was heated to 160 °C for 17 hours. Then, the temperature was increased to 215 °C for another 7 hours and vacuum (<1 mbar) was applied to the system. The reaction mixture was cooled to room temperature and dissolved in THF, then precipitated in a 1:1 (v/v) mixture of water and ethanol. The precipitated polymer was dried under vacuum (<1 mbar) at room temperature. However, some polyesters still showed solvent leftovers in their NMR spectra, also visible in TGA measurements. Thus, TGA is depicted at two different weight losses.

For polyester **3**, FDCA (1.56 g) was used as second monomer with 2.70 g BDO. The polyester was isolated as brownish solid.

$^1\text{H}$  NMR (400 MHz,  $\text{DMSO-}d_6$ )  $\delta$  / ppm = 7.43 – 7.19 (m, 2H,  $\text{CH}^3$ ), 5.33 – 5.11 (m, 2H,  $\text{CH}^2$ ), 1.49 – 1.10 (m, 6H,  $\text{CH}_3^1$ ).

$^{13}\text{C}$  NMR (101 MHz,  $\text{DMSO-}d_6$ )  $\delta$  / ppm = 157.09, 147.56, 145.40, 119.65, 72.96, 16.17, 14.90.

IR (ATR)  $\tilde{\nu}$  /  $\text{cm}^{-1}$  = 1718, 1578, 1382, 1267, 1224, 1135, 1107, 1080, 1018, 996, 965, 825, 763, 618.

$T_{d,5\%}$  = 303 °C (TGA),  $T_{d,15\%}$  = 325 °C (TGA),  $M_n$  = 6 kDa and  $\mathcal{D}$  = 1.80 (SEC-THF),  $M_n$  = 18 kDa and  $\mathcal{D}$  = 1.55 (SEC-HFIP),  $T_g$  = 106 °C (DSC).

ICP-OES measurements were performed with the antisolvents after a threefold precipitation of polyester **3**. In the first precipitation step, 6 to 10 wt% of  $\text{FeCl}_3$  were washed out. In precipitation step 2, less than an additional 0.20 wt% were removed and in the third precipitation step less than 0.01 wt% were removed.

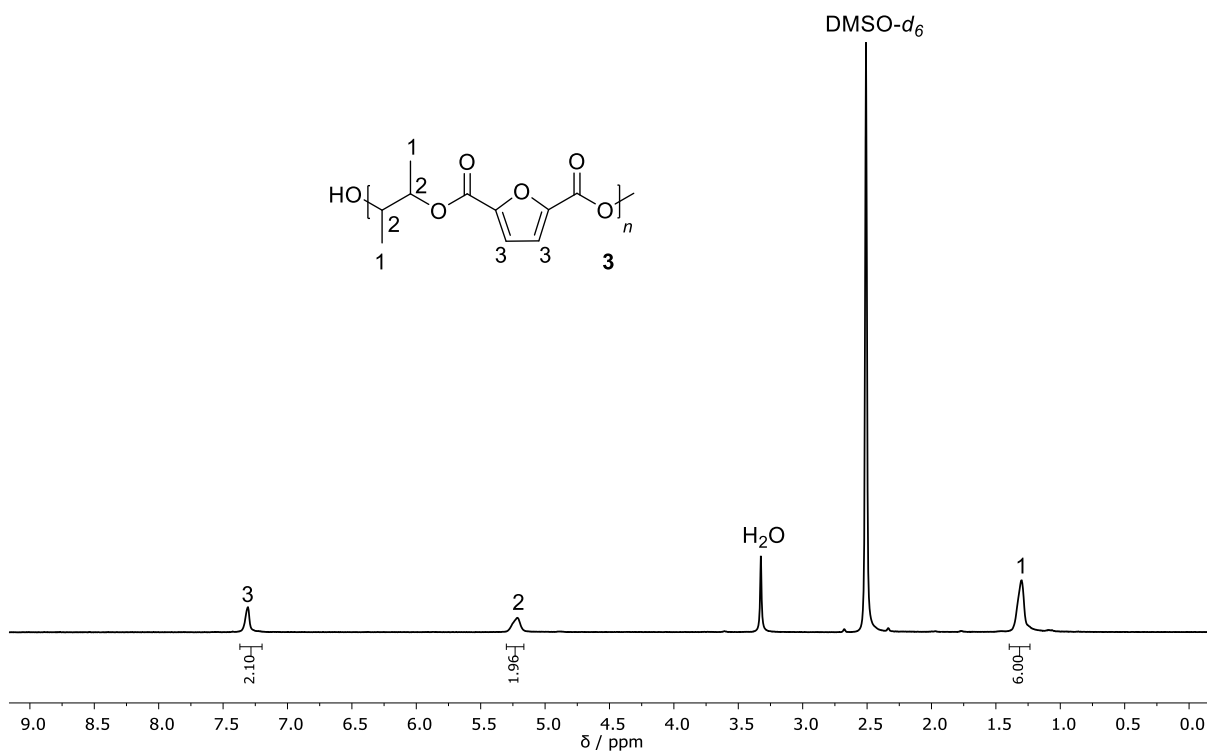

Figure S3.  $^1\text{H}$  NMR spectrum of **3** in  $\text{DMSO-}d_6$ .

For polyester **4**, **1** (1.56 g) was used as dicarboxylic acid with 2.70 g BDO. The polyester was isolated as brownish solid.

$^1\text{H}$  NMR (400 MHz,  $\text{DMSO-}d_6$ )  $\delta$  / ppm = 7.41 – 7.25 (m, 2H,  $\text{CH}^3$ ), 5.36 – 5.10 (m, 2H,  $\text{CH}^2$ ), 1.39 – 1.24 (m, 6H,  $\text{CH}_3^1$ ).

IR (ATR)  $\tilde{\nu}$  /  $\text{cm}^{-1}$  = 1718, 1578, 1382, 1267, 1224, 1135, 1107, 1080, 1018, 996, 965, 825, 763, 617.

$T_{d,5\%}$  = 251 °C (TGA),  $T_{d,15\%}$  = 343 °C (TGA),  $M_n$  = 6 kDa and  $\bar{D}$  = 2.27 (SEC-THF),  $T_g$  = 95 °C (DSC).

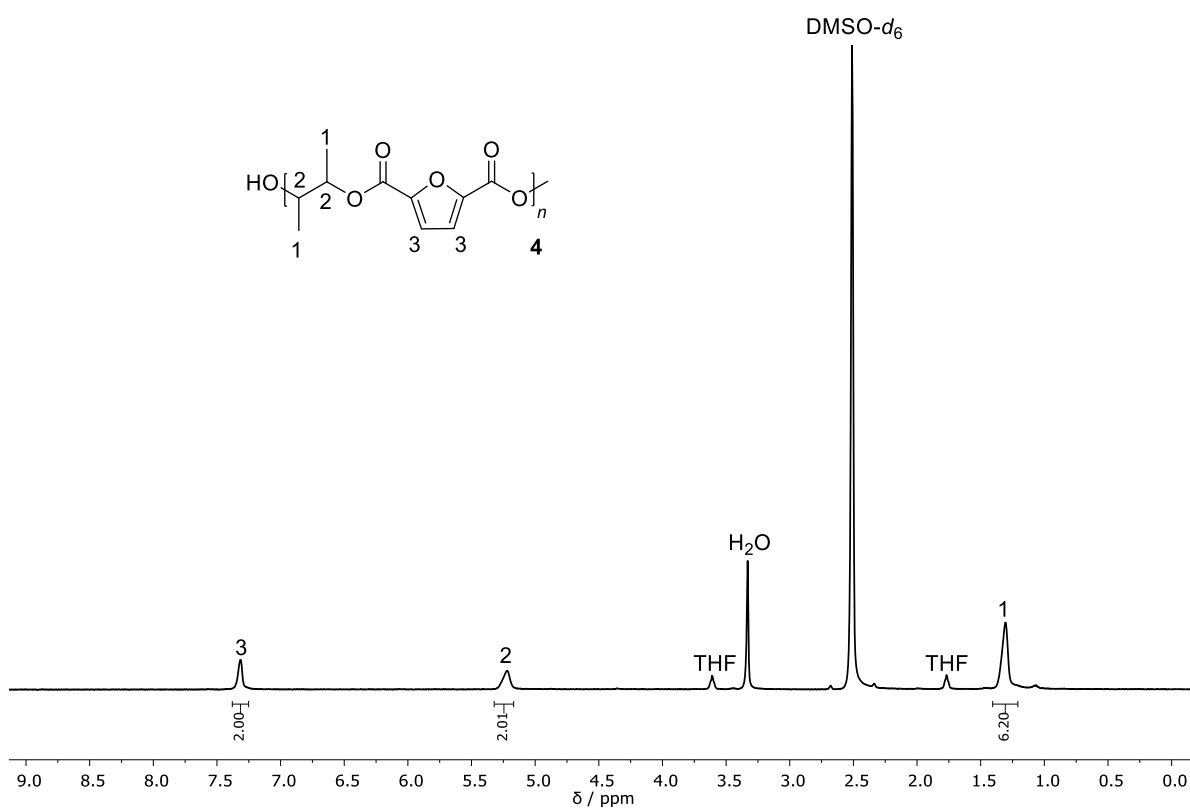

Figure S4.  $^1\text{H}$  NMR spectrum of **4** in  $\text{DMSO-}d_6$ .



For polyester **5**, **2** (1.84 g) was used with 2.70 g BDO. The polyester was isolated as brownish solid.

$^1\text{H}$  NMR (400 MHz,  $\text{DMSO-}d_6$ )  $\delta$  / ppm = 8.12 – 7.96 (m, side-product), 7.48 – 7.17 (m, 2H,  $\text{CH}^3$ ), 5.31 – 5.08 (m, 2H,  $\text{CH}_2^2$ ), 1.40 – 1.12 (m, 6H,  $\text{CH}_3^1$ ).

IR (ATR)  $\tilde{\nu}$  /  $\text{cm}^{-1}$  = 2989, 1715, 1578, 1448, 1380, 1265, 1220, 1129, 1098, 1076, 1018, 998, 963, 905, 893, 868, 825, 761, 734, 685, 617.

$T_{d,5\%}$  = 172 °C (TGA),  $T_{d,15\%}$  = 329 °C (TGA),  $M_n$  = 8 kDa and  $D$  = 2.32 (SEC-THF),  $T_g$  = 90 °C (DSC).

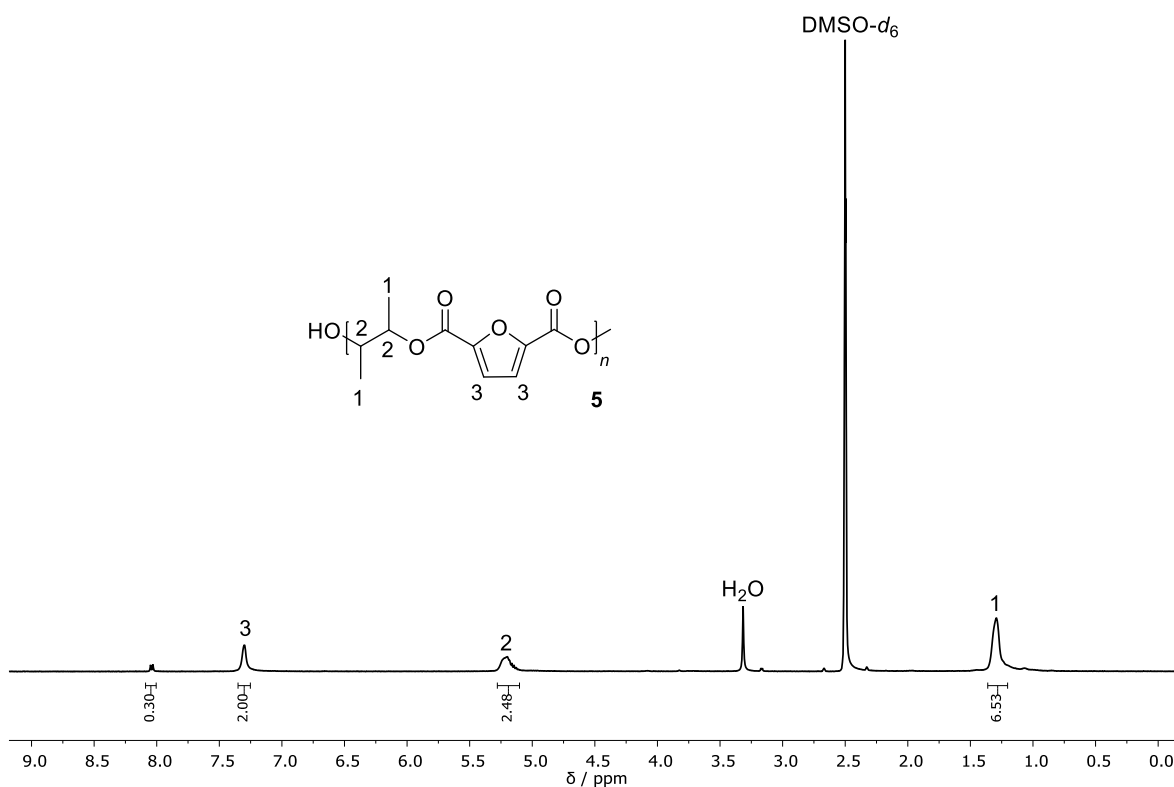

Figure S5.  $^1\text{H}$  NMR spectrum of **5** in  $\text{DMSO-}d_6$ .

For polyester **6** the dicarboxylic acid succinic acid (SA, 1.18 g) was used with 2.70 g BDO. The product was isolated as brownish highly viscous liquid.

$^1\text{H}$  NMR (400 MHz,  $\text{CDCl}_3$ )  $\delta$  / ppm = 5.09 – 4.87 (m, 2H,  $\text{CH}^2$ ), 2.71 – 2.49 (m, 4H,  $\text{CH}_2^3$ ), 1.34 – 1.07 (m, 6H,  $\text{CH}_3^1$ ).

IR (ATR)  $\tilde{\nu}$  /  $\text{cm}^{-1}$  = 2987, 2941, 1726, 1537, 1446, 1413, 1376, 1349, 1316, 1261, 1240, 1209, 1152, 1100, 1082, 1035, 1020, 1000, 965, 921, 860, 802, 570.

$T_{d,5\%}$  = 280 °C (TGA),  $T_{d,15\%}$  = 336 °C (TGA),  $M_n$  = 5 kDa and  $D$  = 1.47 (SEC-THF).

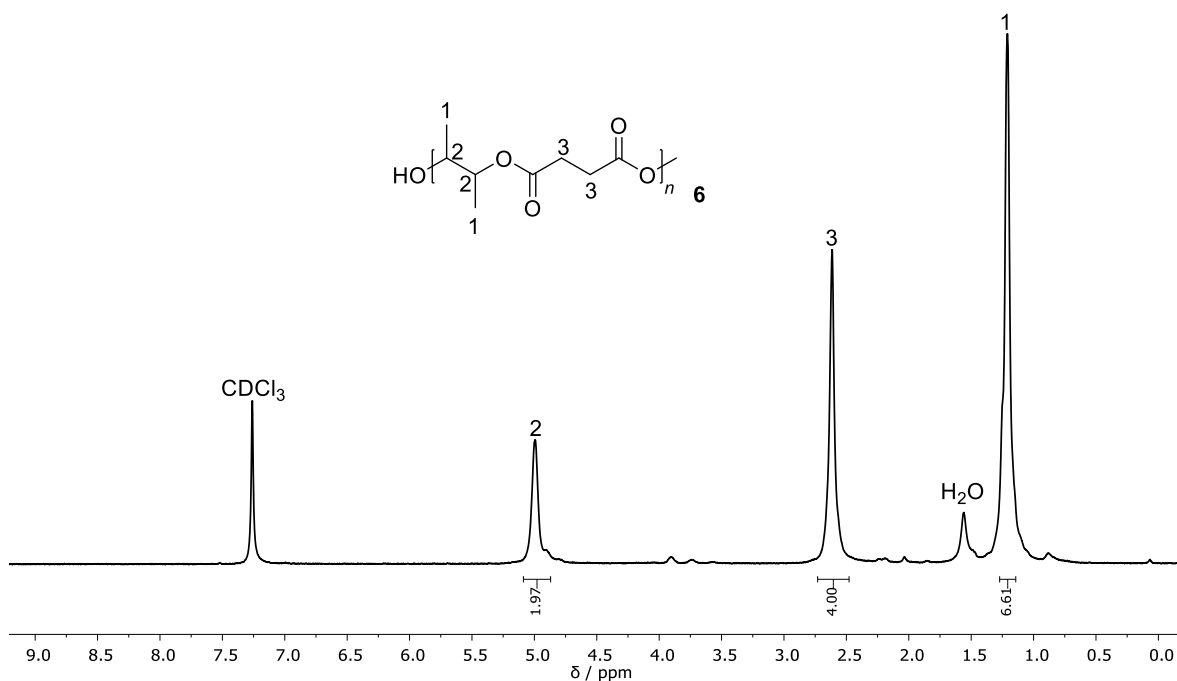

Figure S6.  $^1\text{H}$  NMR spectrum of **6** in  $\text{CDCl}_3$ .

For polyester **7**, the dicarboxylic acid adipic acid (AA, 1.46 g) was used with 2.70 g BDO. The product was isolated as brownish highly viscous liquid.

$^1\text{H}$  NMR (400 MHz,  $\text{DMSO-}d_6$ )  $\delta$  / ppm = 4.98 – 4.80 (m, 2H,  $\text{CH}^2$ ), 4.33 (d,  $J = 5.3$  Hz, 1H,  $\text{OH}^7$ ), 3.44 (t,  $J = 6.6$  Hz, 2H,  $\text{CH}^6$ ), 2.36 – 2.19 (m, 4H,  $\text{CH}_2^3$ ), 1.60 – 1.46 (m, 4H,  $\text{CH}_2^4$ ), 1.18 – 1.07 (m, 6H,  $\text{CH}_3^1$ ), 1.07 (s, 3H,  $\text{CH}_3^5$ ).

IR (ATR)  $\tilde{\nu}$  /  $\text{cm}^{-1}$  = 2985, 2941, 1728, 1528, 1448, 1419, 1378, 1312, 1286, 1240, 1216, 1166, 1137, 1100, 1080, 1043, 1022, 1002, 946.

$T_{d,5\%} = 326$  °C (TGA),  $T_{d,15\%} = 350$  °C (TGA),  $M_n = 8$  kDa and  $D = 1.44$  (SEC-HFIP).

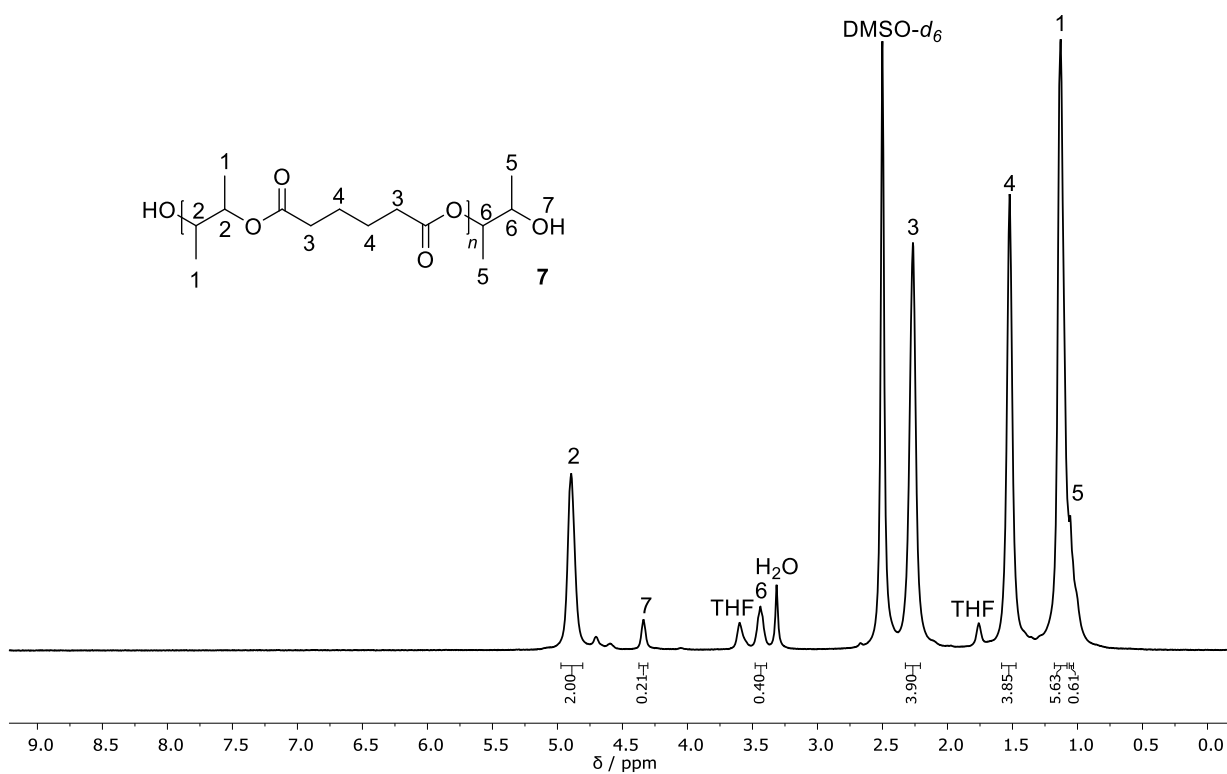

Figure S7.  $^1\text{H}$  NMR spectrum of **7** in  $\text{DMSO-}d_6$ .

For polyester **8**, the dicarboxylic acid sebacic acid (SBA, 2.02 g) was used with 2.70 g BDO. The product was isolated as brownish highly viscous liquid.

$^1\text{H}$  NMR (400 MHz,  $\text{DMSO-}d_6$ )  $\delta$  / = 4.96 – 4.82 (m, 2H,  $\text{CH}^2$ ), 2.28 – 2.17 (m, 4H,  $\text{CH}_2^3$ ), 1.54 – 1.45 (m, 4H,  $\text{CH}_2^4$ ), 1.28 – 1.20 (m, 8H,  $\text{CH}_2^5$ ), 1.16 – 0.98 (m, 6H,  $\text{CH}_3^1$ ).

IR (ATR)  $\tilde{\nu}$  /  $\text{cm}^{-1}$  = 2983, 2931, 2855, 1732, 1450, 1419, 1378, 1349, 1316, 1300, 1242, 1166, 1131, 1100, 1082, 1035, 1004, 944, 868, 726.

$T_{d, 5\%}$  = 358 °C (TGA),  $M_n$  = 10 kDa and  $\mathcal{D}$  = 1.47 (SEC-HFIP).

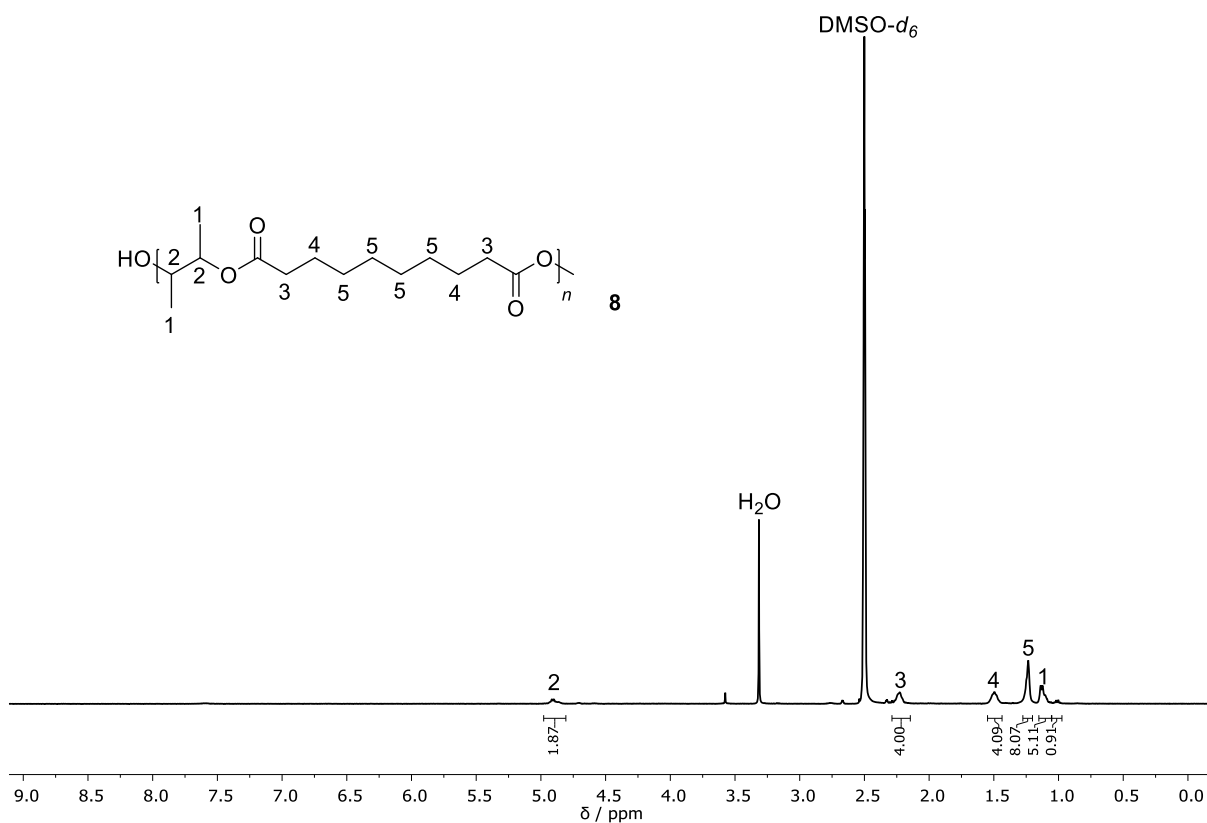

Figure S8.  $^1\text{H}$  NMR spectrum of **8** in  $\text{DMSO-}d_6$ .

## Copolymerization reactions of two dicarboxylic acids with BDO

2.70 g of BDO (3.00 equiv., 30.0 mmol) were added to 1 equiv. (1 mmol) of a mixture of two dicarboxylic acids (FDCA and AA) and  $\text{FeCl}_3$  (1.25 mol%, 20.0 mg, 0.120 mmol) as catalyst. The mixture was stirred at 160 °C for 17 hours. Then, the temperature was increased to 215 °C and vacuum (<1 mbar) was applied. The mixture was cooled to room temperature, dissolved in THF, and precipitated in a mixture of 1:1 (v/v) water and ethanol. The isolated copolyester was dried under vacuum (<1mbar) at room temperature. However, some polyesters still showed solvent leftovers in their NMR spectra, also visible in TGA measurements. Thus, TGA is depicted at two different weight losses.

For copolyester **9**, a mixture of 94% FDCA (9.40 mmol, 1.46 g) and 6% AA (0.60 mmol, 88.0 mg) was used. The copolyester was isolated as brownish solid.

$^1\text{H}$  NMR (400 MHz,  $\text{DMSO-}d_6$ )  $\delta$  / ppm = 7.43 – 7.20 (m, 2H,  $\text{CH}^1$ ), 5.30 – 4.89 (m, 4H,  $\text{CH}^2$ ), 2.30 – 2.11 (m, 4H,  $\text{CH}_2^4$ ), 1.48 – 1.36 (m, 4H,  $\text{CH}_2^5$ ), 1.36 – 1.08 (m, 12H,  $\text{CH}_3^3$ ).

IR (ATR)  $\tilde{\nu}$  /  $\text{cm}^{-1}$  = 2987, 1715, 1578, 1506, 1448, 1380, 1265, 1220, 1131, 1107, 1078, 1016, 996, 963, 905, 866, 825, 784, 761, 720, 617.

$T_{d,5\%}$  = 310 °C (TGA),  $T_{d,15\%}$  = 340 °C (TGA),  $M_n$  = 15 kDa and  $D$  = 1.62 (SEC-HFIP),  $T_g$  = 84 °C (DSC).

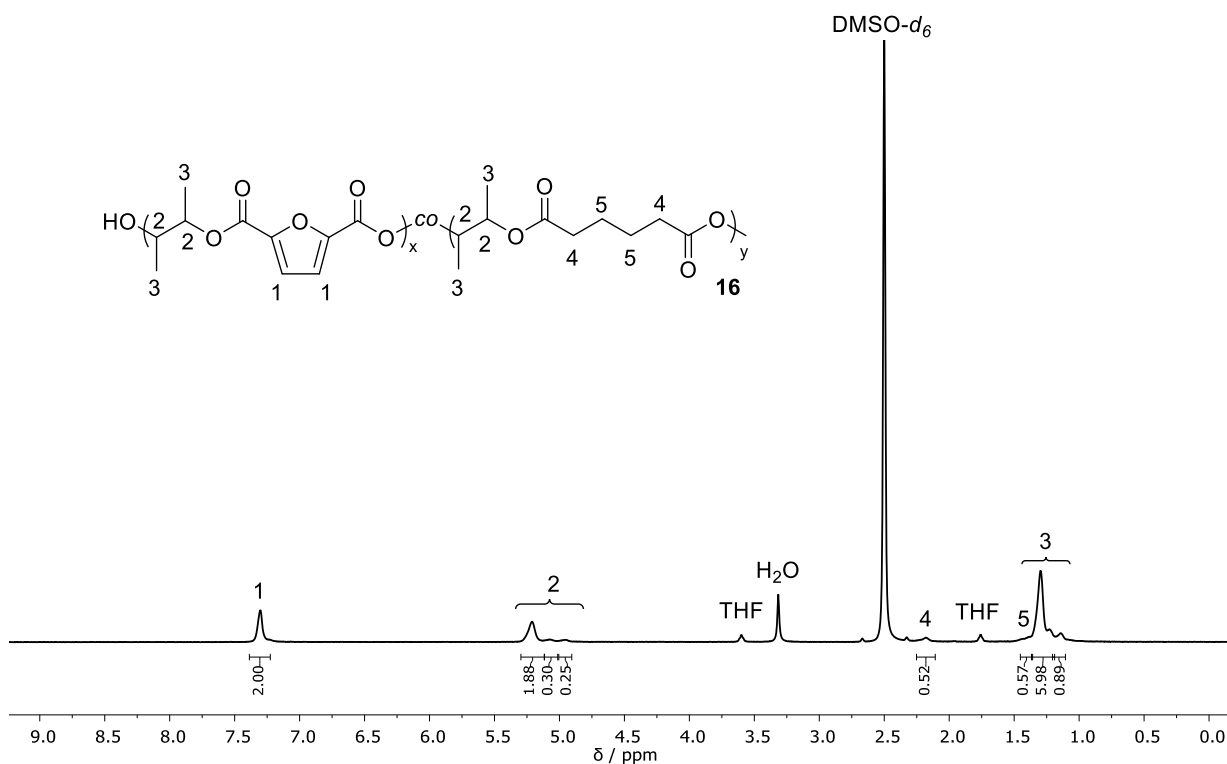

Figure S9.  $^1\text{H}$  NMR spectrum of **16** in  $\text{DMSO-}d_6$ .

For copolyester **10**, a mixture of 88% FDCA (8.80 mmol, 1.37 g) and 12% AA (1.20 mmol, 175 mg) was used. The copolyester was isolated as brownish solid.

$^1\text{H NMR}$  (400 MHz,  $\text{DMSO-}d_6$ )  $\delta$  / ppm = 7.40 – 7.23 (m, 2H,  $\text{CH}^1$ ), 5.34 – 4.90 (m, 4H,  $\text{CH}^2$ ), 2.22 – 2.11 (m, 4H,  $\text{CH}_2^4$ ), 1.50 – 1.36 (m, 4H,  $\text{CH}_2^5$ ), 1.36 – 1.10 (m, 12H,  $\text{CH}_3^3$ ).

IR (ATR)  $\tilde{\nu}$  /  $\text{cm}^{-1}$  = 2989, 1715, 1580, 1448, 1380, 1265, 1220, 1131, 1107, 1078, 1016, 996, 963, 905, 866, 825, 763, 617.

$T_{d,5\%} = 324$  °C (TGA),  $T_{d,15\%} = 343$  °C (TGA),  $M_n = 21$  kDa and  $D = 1.80$  (SEC-HFIP),  $T_g = 81$  °C (DSC).

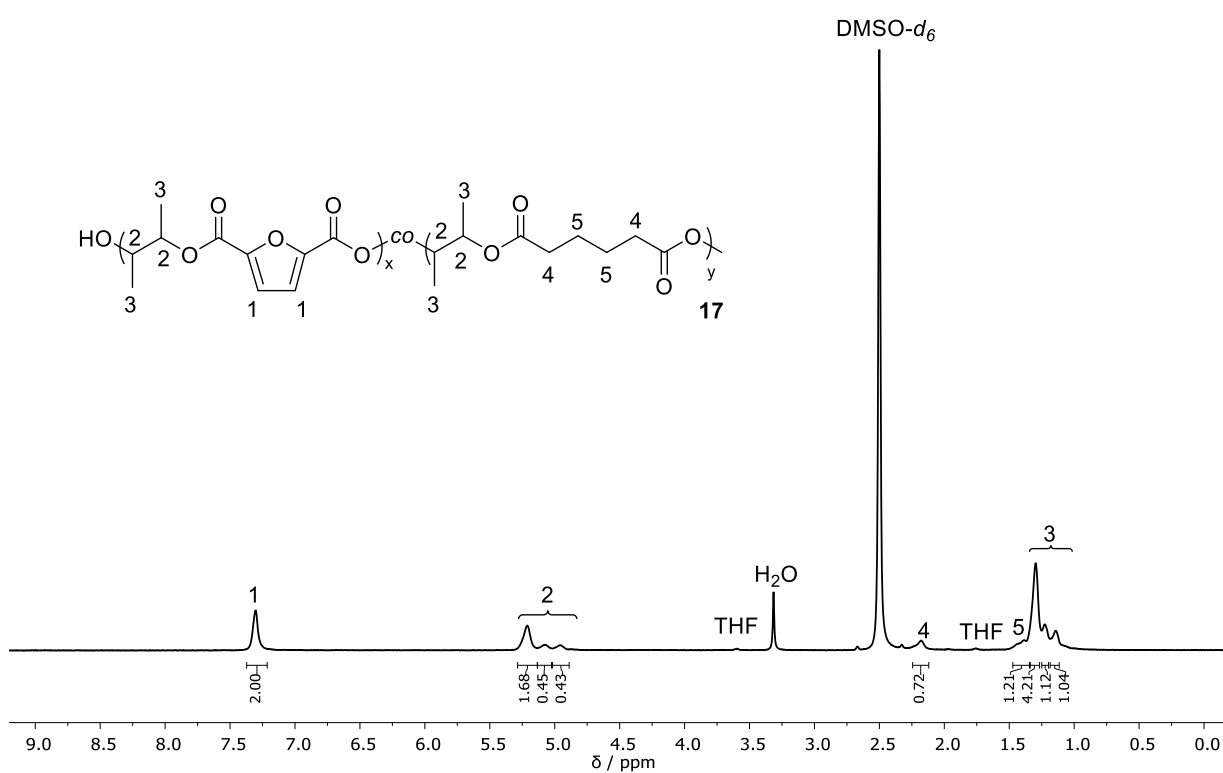

Figure S10.  $^1\text{H NMR}$  spectrum of **17** in  $\text{DMSO-}d_6$ .

For copolyester **11**, a mixture of 82% FDCA (8.20 mmol, 1.28 g) and 18% AA (1.80 mmol, 263 mg) was used. The copolyester was isolated as brownish solid.

$^1\text{H}$  NMR (400 MHz,  $\text{DMSO-}d_6$ )  $\delta$  / ppm = 7.49 – 7.13 (m, 2H,  $\text{CH}^1$ ), 5.37 – 4.89 (m, 4H,  $\text{CH}^2$ ), 2.30 – 2.06 (m, 4H,  $\text{CH}_2^4$ ), 1.47 – 1.38 (m, 4H,  $\text{CH}_2^5$ ), 1.35 – 0.84 (m, 12H,  $\text{CH}_3^3$ ).

IR (ATR)  $\tilde{\nu}$  /  $\text{cm}^{-1}$  = 2987, 2934, 1715, 1578, 1448, 1380, 1347, 1335, 1265, 1220, 1131, 1107, 1078, 1016, 996, 963, 905, 866, 825, 792, 763, 617.

$T_{d,5\%}$  = 149 °C (TGA),  $T_{d,15\%}$  = 337 °C (TGA),  $M_n$  = 16 kDa and  $D$  = 1.84 (SEC-HFIP),  $T_g$  = 62 °C (DSC).

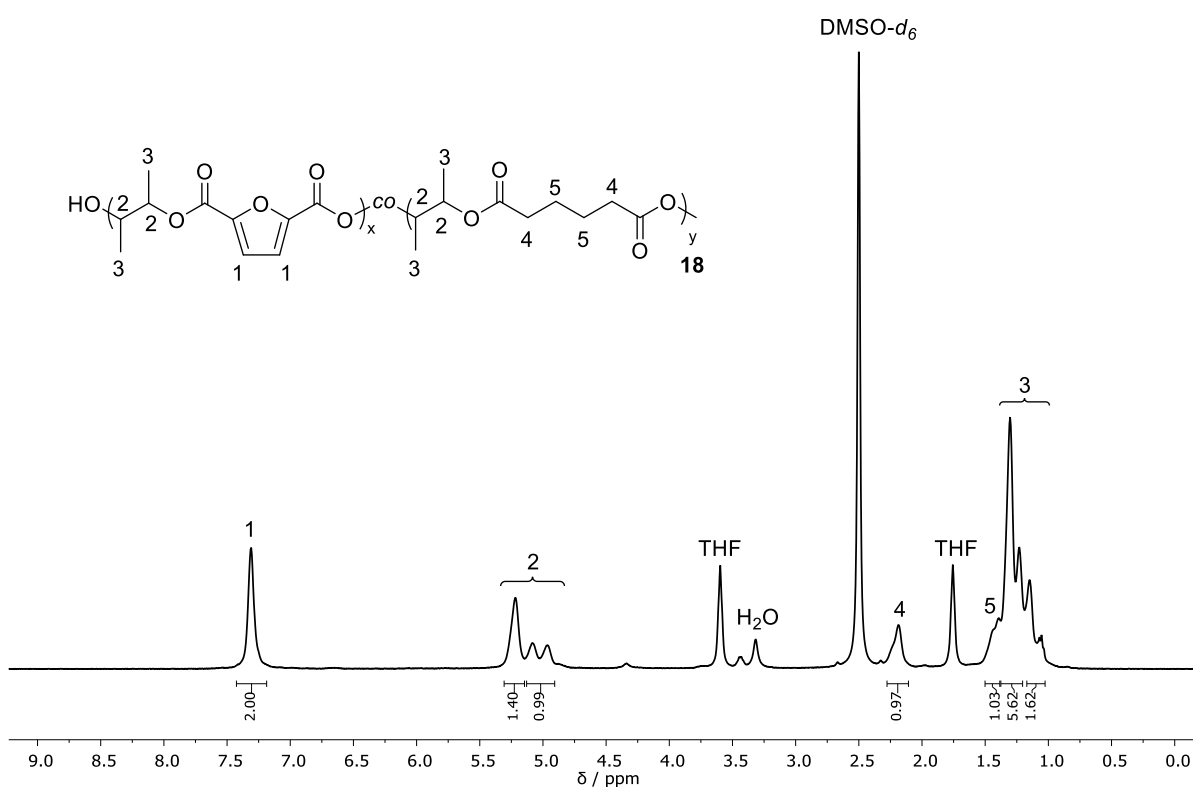

Figure S11.  $^1\text{H}$  NMR spectrum of **18** in  $\text{DMSO-}d_6$ .



For copolyester **12**, a mixture of 76% FDCA (7.60 mmol, 1.18 g) and 24% AA (2.40 mmol, 351 mg) was used. The copolyester was isolated as brownish solid.

$^1\text{H NMR}$  (400 MHz,  $\text{DMSO-}d_6$ )  $\delta$  / ppm = 7.51 – 7.12 (m, 2H,  $\text{CH}^1$ ), 5.42 – 4.78 (m, 4H,  $\text{CH}^2$ ), 2.33 – 2.04 (m, 4H,  $\text{CH}_2^4$ ), 1.55 – 1.34 (m, 4H,  $\text{CH}_2^5$ ), 1.36 – 1.02 (m, 12H,  $\text{CH}_3^3$ ).

IR (ATR)  $\tilde{\nu}$  /  $\text{cm}^{-1}$  = 2985, 2941, 1715, 1580, 1448, 1380, 1339, 1267, 1222, 1133, 1107, 1078, 1016, 963, 905, 866, 827, 763, 617.

$T_{d,5\%}$  = 145 °C (TGA),  $T_{d,15\%}$  = 338 °C (TGA),  $M_n$  = 14 kDa and  $\bar{D}$  = 1.68 (SEC-HFIP),  $T_g$  = 58 °C (DSC).

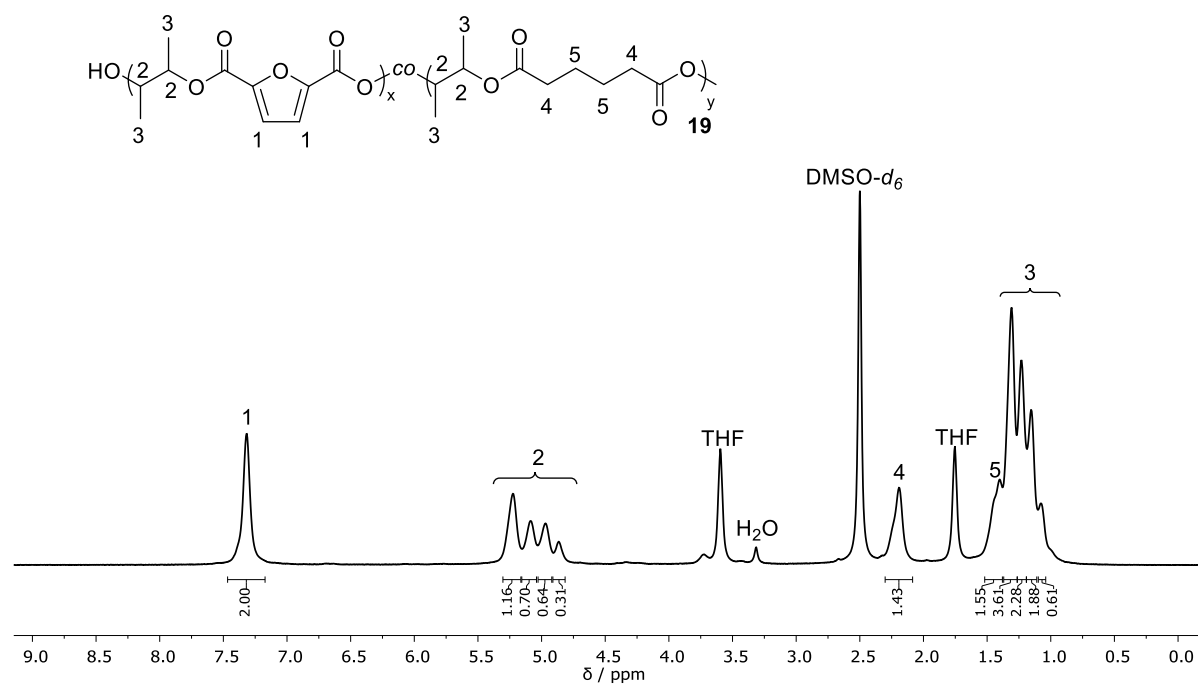

Figure S12.  $^1\text{H NMR}$  spectrum of **19** in  $\text{DMSO-}d_6$ .

For copolyester **13**, a mixture of 70% FDCA (7.00 mmol, 1.09 g) and 30% AA (3.00 mmol, 483 mg) was used. The copolyester was isolated as brownish solid.

$^1\text{H}$  NMR (400 MHz,  $\text{DMSO-}d_6$ )  $\delta$  / ppm = 7.47 – 7.19 (m, 2H,  $\text{CH}^1$ ), 5.34 – 4.78 (m, 4H,  $\text{CH}^2$ ), 2.28 – 2.13 (m, 4H,  $\text{CH}_2^4$ ), 1.54 – 1.36 (m, 4H,  $\text{CH}_2^5$ ), 1.37 – 1.02 (m, 12H,  $\text{CH}_3^3$ ).

IR (ATR)  $\tilde{\nu}$  /  $\text{cm}^{-1}$  = 2985, 2941, 1715, 1580, 1448, 1380, 1341, 1267, 1222, 1160, 1133, 1105, 1078, 1037, 1016, 963, 903, 866, 827, 763, 617.

$T_{d,5\%}$  = 245 °C (TGA),  $T_{d,15\%}$  = 338 °C (TGA),  $M_n$  = 10 kDa and  $\bar{D}$  = 1.73 (SEC-HFIP),  $T_g$  = 40 °C (DSC).

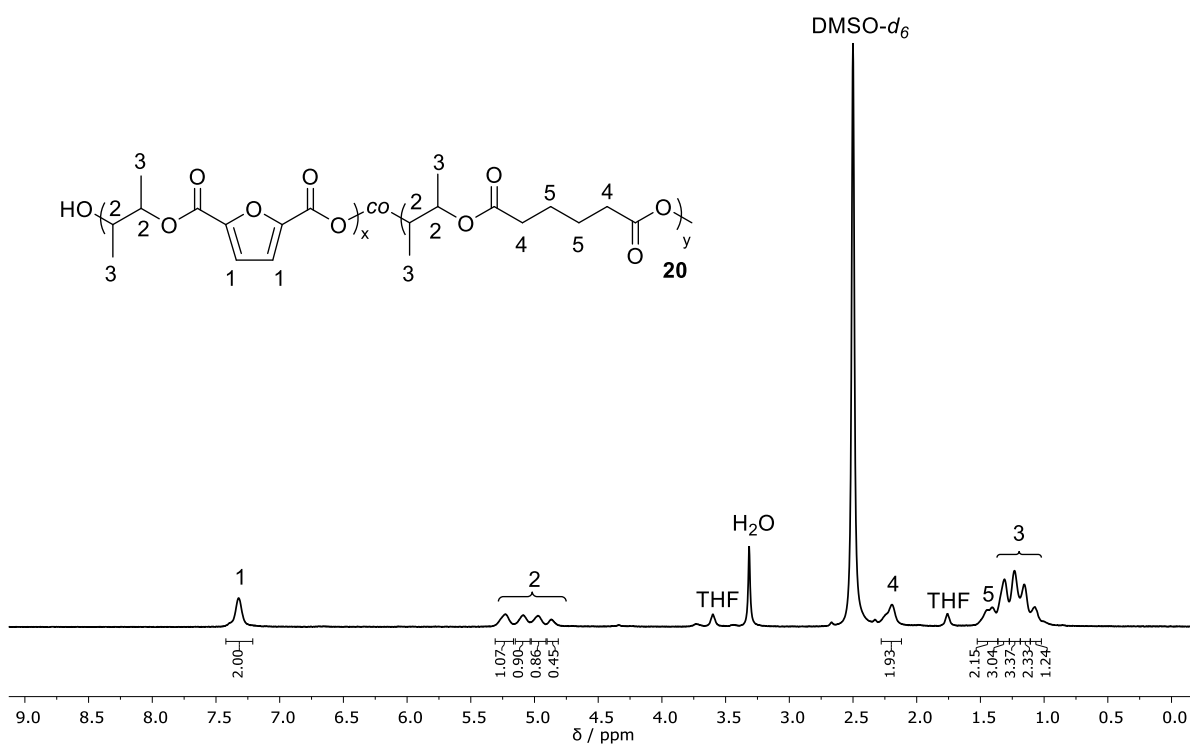

Figure S13.  $^1\text{H}$  NMR spectrum of **20** in  $\text{DMSO-}d_6$ .

For copolyester **14**, a mixture of 60% FDCA (6.00 mmol, 937 mg) and 40% AA (4.00 mmol, 585 mg) was used. The copolyester was isolated as brownish viscous liquid.

$^1\text{H NMR}$  (400 MHz,  $\text{DMSO-}d_6$ )  $\delta$  / ppm = 7.43 – 7.23 (m, 2H,  $\text{CH}^1$ ), 5.35 – 4.78 (m, 4H,  $\text{CH}^2$ ), 2.31 – 2.10 (m, 4H,  $\text{CH}_2^4$ ), 1.61 – 1.39 (m, 4H,  $\text{CH}_2^5$ ), 1.36 – 1.01 (m, 12H,  $\text{CH}_3^3$ ).

IR (ATR)  $\tilde{\nu}$  /  $\text{cm}^{-1}$  = 2987, 2941, 1715, 1580, 1448, 1417, 1380, 1345, 1267, 1222, 1162, 1133, 1109, 1078, 1037, 1018, 899, 866, 827, 784, 763, 617.

$T_{d,5\%}$  = 243 °C (TGA),  $T_{d,15\%}$  = 337 °C (TGA),  $M_n$  = 12 kDa and  $\bar{D}$  = 1.67 (SEC-HFIP).

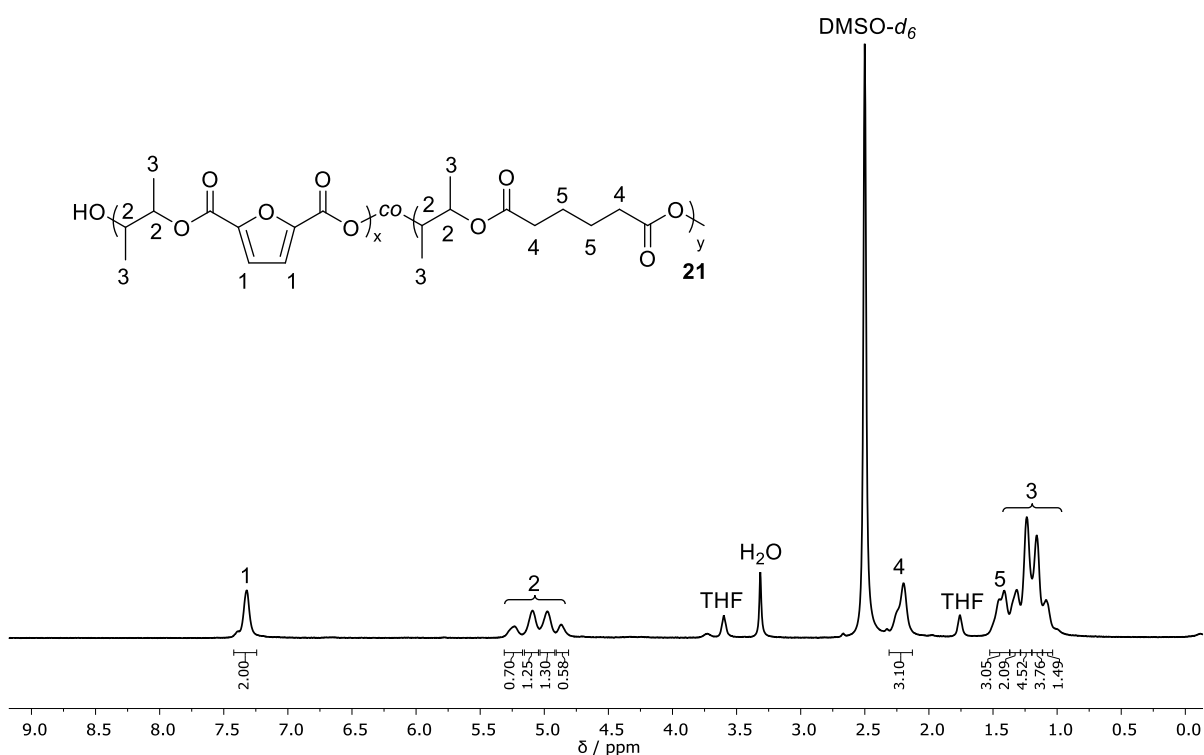

Figure S14.  $^1\text{H NMR}$  spectrum of **21** in  $\text{DMSO-}d_6$ .

For copolyester **15**, a mixture of 40% FDCA (4.00 mmol, 624 mg) and 60% AA (6.00 mmol, 877 mg) was used. The copolyester was isolated as brownish viscous liquid.

$^1\text{H}$  NMR (400 MHz,  $\text{DMSO-}d_6$ )  $\delta$  / ppm = 7.40 – 7.27 (m, 2H,  $\text{CH}^1$ ), 5.34 – 4.78 (m, 4H,  $\text{CH}^2$ ), 2.35 – 2.10 (m, 4H,  $\text{CH}_2^4$ ), 1.58 – 1.38 (m, 4H,  $\text{CH}_2^5$ ), 1.33 – 0.49 (m, 12H,  $\text{CH}_3^3$ ).

IR (ATR)  $\tilde{\nu}$  /  $\text{cm}^{-1}$  = 2987, 2941, 1722, 1580, 1448, 1419, 1380, 1271, 1222, 1164, 1135, 1100, 1080, 1039, 1018, 1002, 965, 897, 866, 829, 765, 617.

$T_{d,5\%} = 274$  °C (TGA),  $T_{d,15\%} = 343$  °C (TGA),  $M_n = 6$  kDa and  $D = 1.48$  (SEC-HFIP).

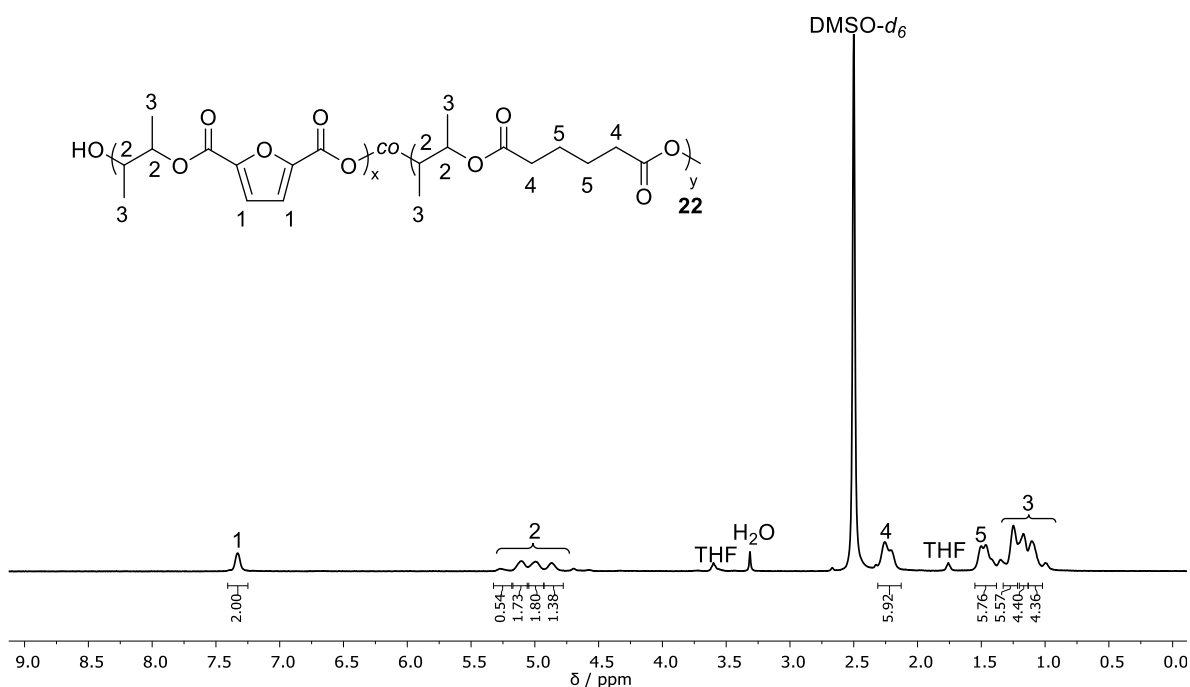

Figure S15.  $^1\text{H}$  NMR spectrum of **22** in  $\text{DMSO-}d_6$ .

## Depolymerization of Poly(ethylene terephthalate)

Commercially available PET materials (1.00 equiv., 500 mg, 2.60 mmol) were cut into flakes and polyester solid **3** (powder) was used for optimization. Per batch, the chosen material was mixed with ethylene glycol (15.48 equiv., 2.50 g, 2.25 mL) and FeCl<sub>3</sub> (1.25 mol%, 100 mg, 0.062 mmol). The mixture was heated in a carousel reactor to 190 °C for 3 h. Then, the mixture was cooled to room temperature followed by adding 15.0 mL distilled water and heating up to 70 °C for 30 min. Subsequently, the solid fraction was filtered off and the remaining liquid fraction put into a fridge at 8 °C, for 16 h. The precipitated BHET was filtered off, dried, and obtained as white crystals as final product.

<sup>1</sup>H NMR (400 MHz, DMSO-*d*<sub>6</sub>) δ / ppm = 8.13 (s, 4H, CH<sub>Ar</sub><sup>1</sup>), 4.96 (t, J = 5.7 Hz, 2H, OH<sup>2</sup>), 4.33 (t, J = 9.8 Hz, 4H, CH<sub>2</sub><sup>3</sup>), 3.73 (q, J = 5.5 Hz, 4H, CH<sub>2</sub><sup>4</sup>).

<sup>13</sup>C NMR (101 MHz, DMSO-*d*<sub>6</sub>) δ / ppm = 165.63, 134.22, 129.99, 67.50, 59.45.

HRMS (ESI) *m/z*: [M]<sup>+</sup> calc for C<sub>12</sub>H<sub>14</sub>O<sub>6</sub>, 254.0790, found 255.0862.

*T*<sub>m</sub> = 108 °C (DSC).

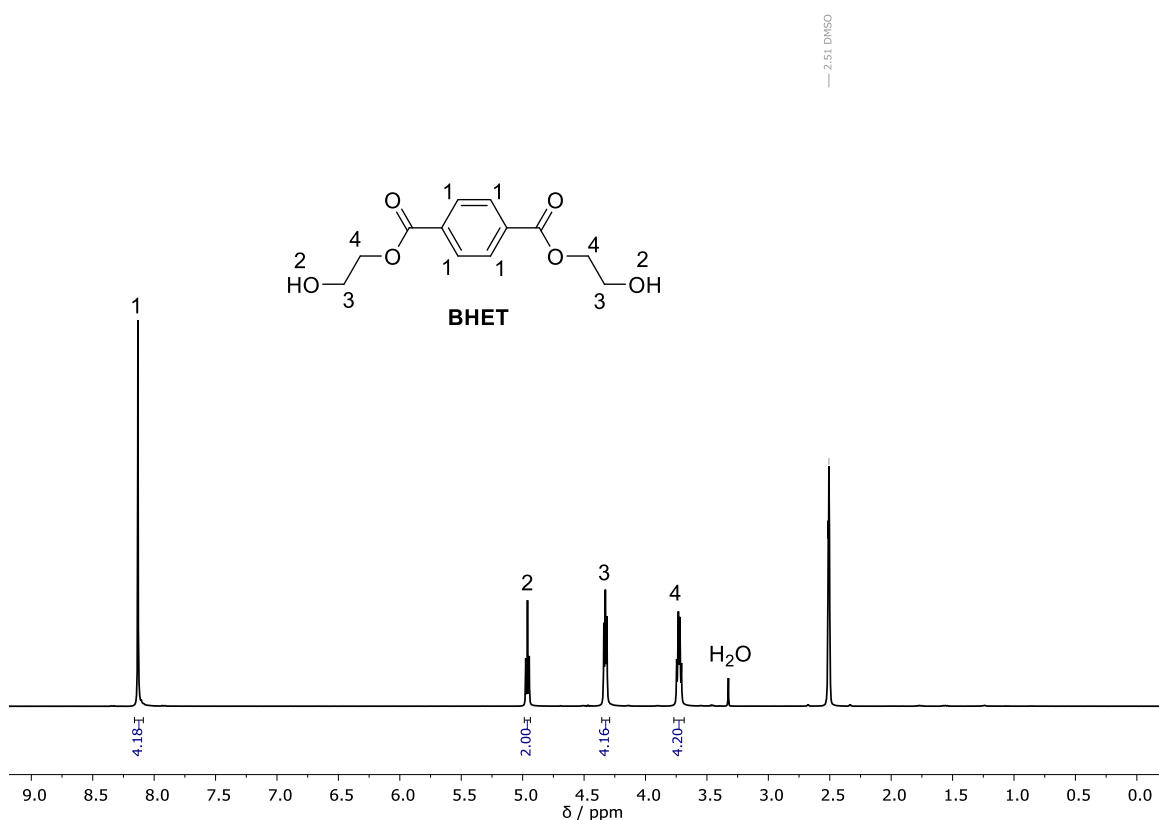

Figure S16. <sup>1</sup>H NMR spectrum of **BHET** in DMSO-*d*<sub>6</sub>.
